# Supplementary material
Source: Springer Nature journal article supplement (https://www.springermedizin.de/resource/supplementary/12889_2012_5824_MOESM1_ESM.pdf/9496206)

## Additional figures:

### Self-reported and reported HIV prevalence in MSM by 5-year age groups in Germany, United Kingdom, the Netherlands, Sweden, Portugal, and the Czech Republic.

#### Self-reported and reported HIV prevalence in MSM, Germany

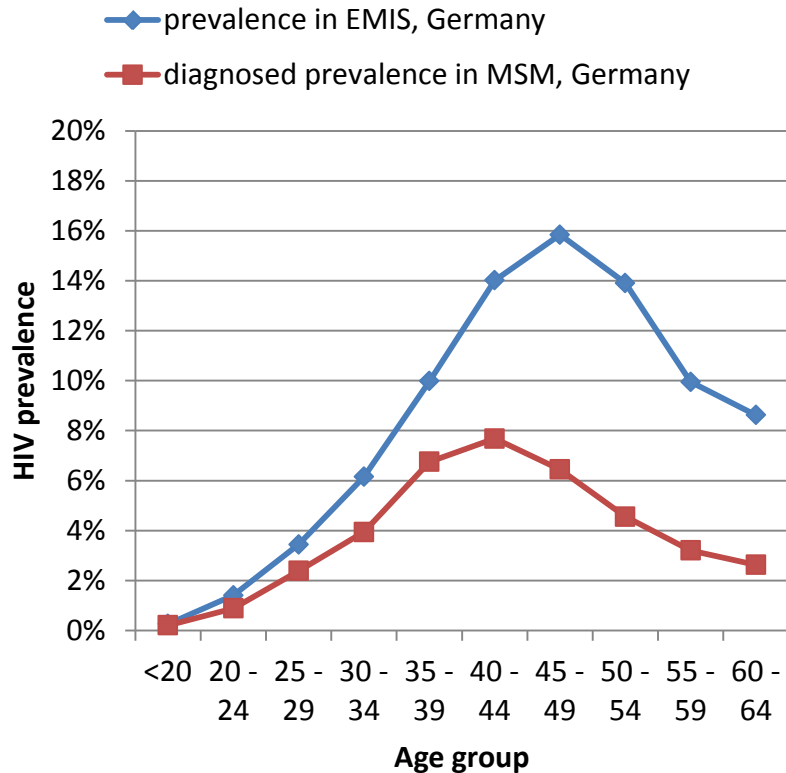

#### Self-reported and reported HIV prevalence in MSM, UK

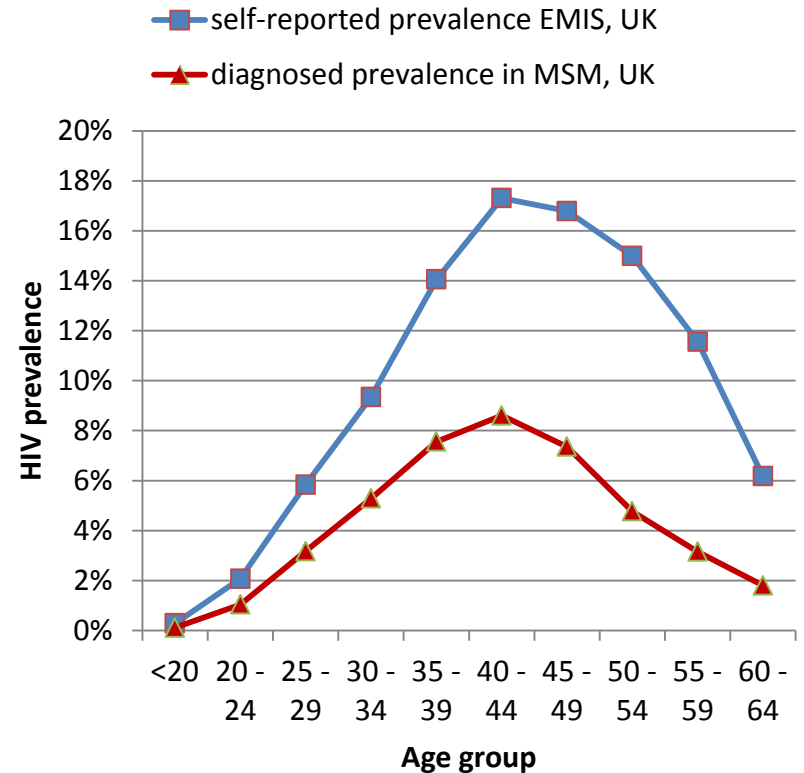

### Self-reported and reported HIV prevalence in MSM, Netherlands

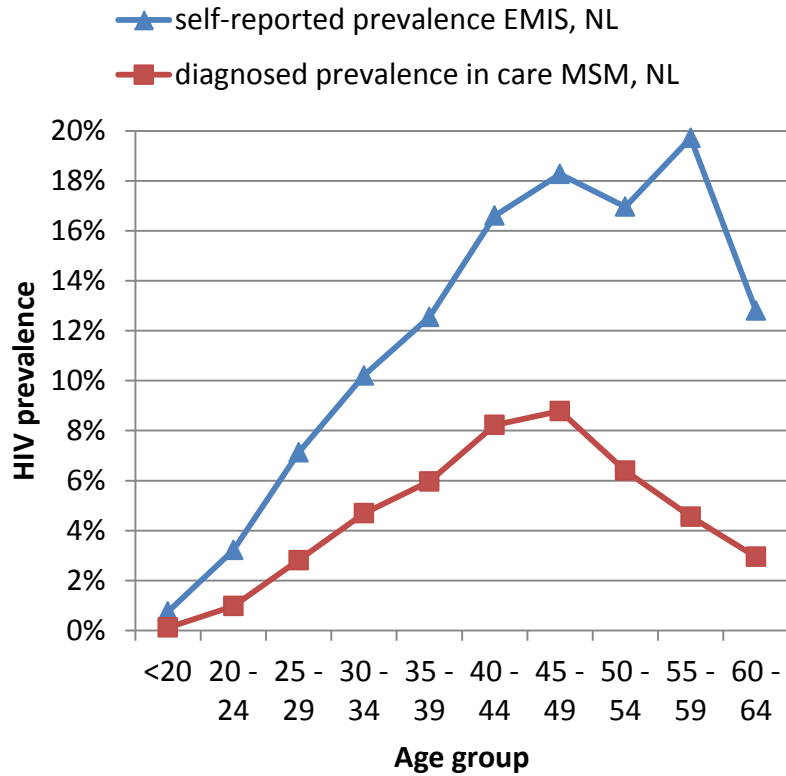

### Self-reported and reported HIV prevalence in MSM, Sweden

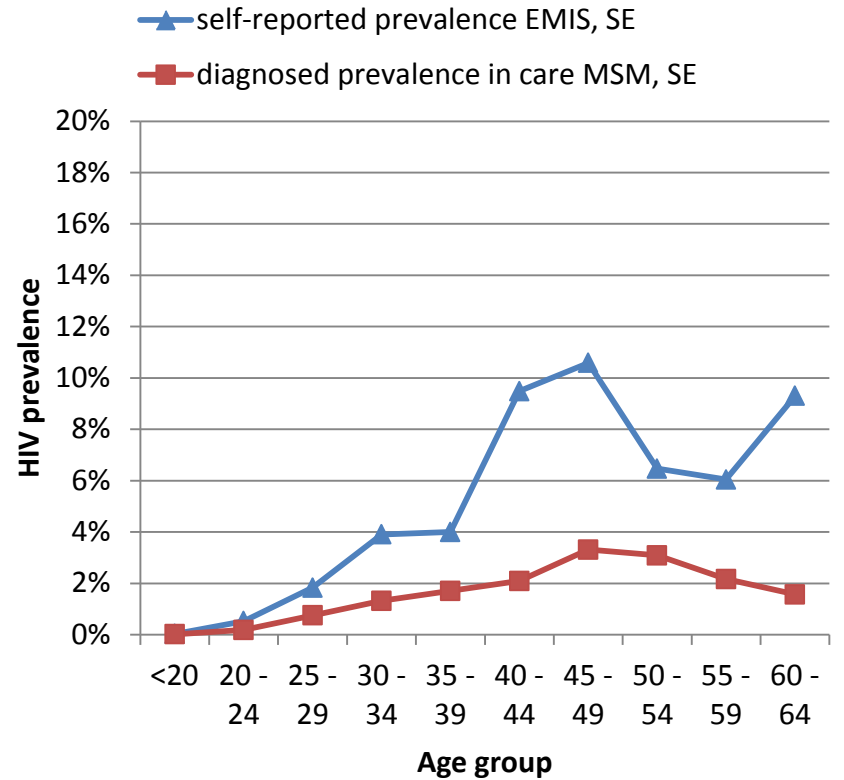

### Self-reported and reported HIV prevalence in MSM, Portugal

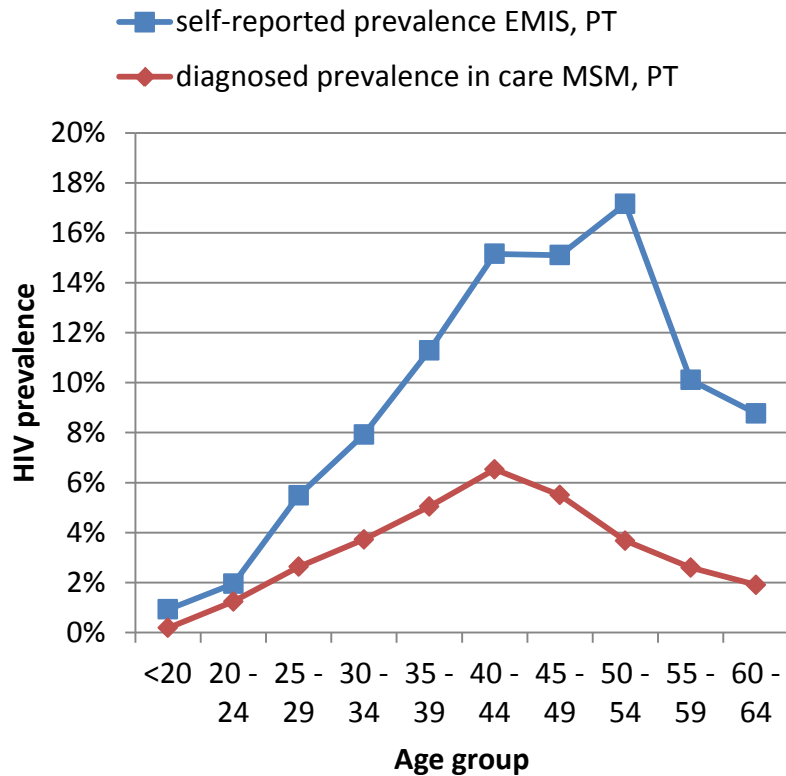

### Self-reported and reported HIV prevalence in MSM, Czech Republic

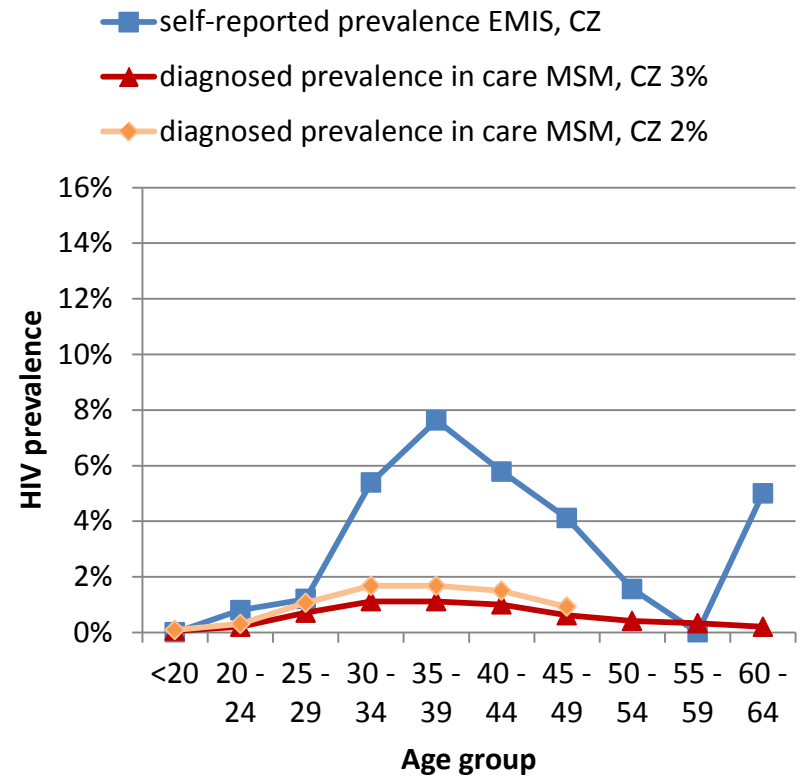

Supplement: MOESM1 [file 9496206]
